# Supplementary material for: Risk factors for acute kidney injury in COVID-19 patients: an updated systematic review and meta-analysis
Source: PubMed Central journal article supplement — Ren Fail. 2023 Apr 6;45(1):2170809. doi: 10.1080/0886022X.2023.2170809 (PMC10081062; doi:10.1080/0886022x.2023.2170809), 2023-04-06

**Supplementary material for:**

**Risk Factors for Acute Kidney Injury in COVID-19 Patients: A Systematic Review and Meta-Analysis**

**Table of contents:**

**Supplementary Table 1:** Search strategy for Embase

**Supplementary Figure 1:** Forest plot diagram for estimating the overall prevalence of AKI

**Supplementary Figure 2:** Forest plot diagram for estimating the overall prevalence of mortality in patients developed AKI

**Supplementary Figure 3:** Sensitivity analysis for hypertension

**Supplementary Figure 4:** Sensitivity analysis for chronic kidney disease

**Supplementary Figure 5:** Sensitivity analysis for diabetes mellitus

**Supplementary Figure 6:** Funnel plot

### **Search strategy for Embase**

#1 ((2019 AND novel AND coronavirus AND disease:ab,ti OR '2019 ncov') AND disease:ab,ti OR 'sars cov 2') AND disease

#2 (acute AND kidney AND injury:ab,ti OR acute) AND renal AND failure

#3 (risk AND factor:ab,ti OR relative) AND risk

#4 #1 AND #2 AND #3

**Supplementary Figure 1: Forest plot diagram for estimating the overall prevalence of AKI**

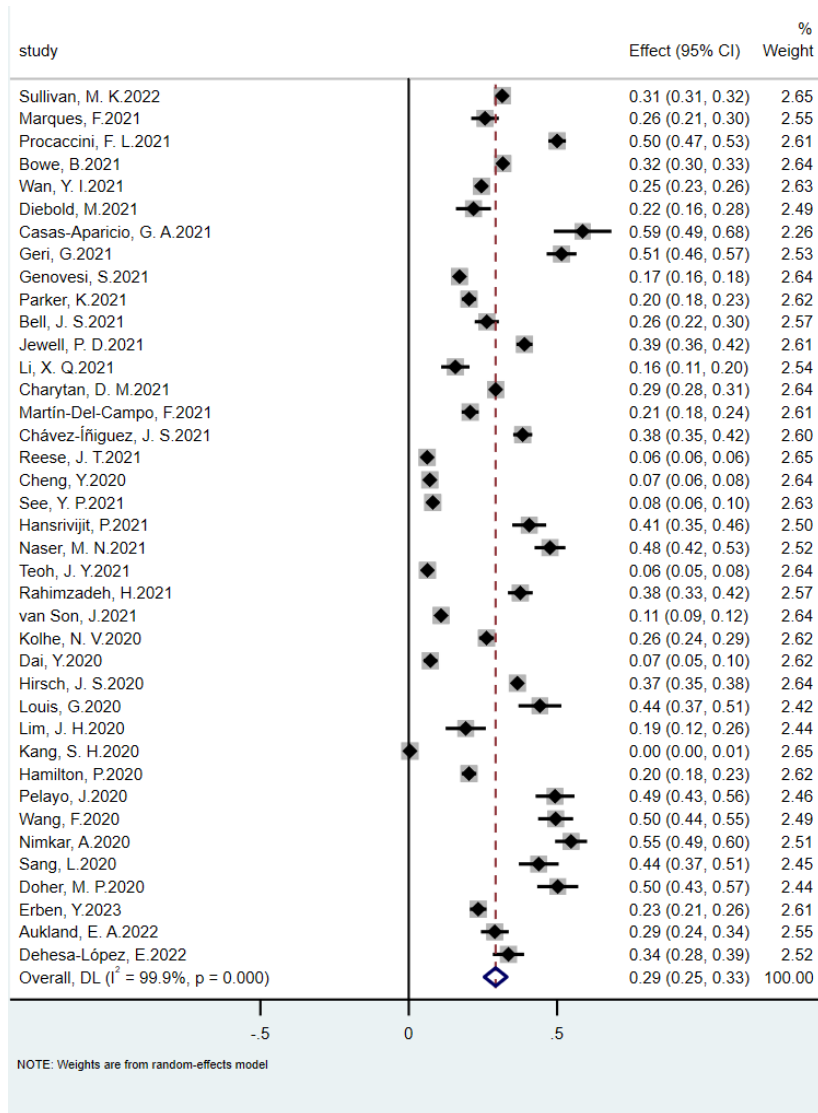

**Supplementary Figure 2: Forest plot diagram for estimating the overall prevalence of mortality in patients developed AKI**

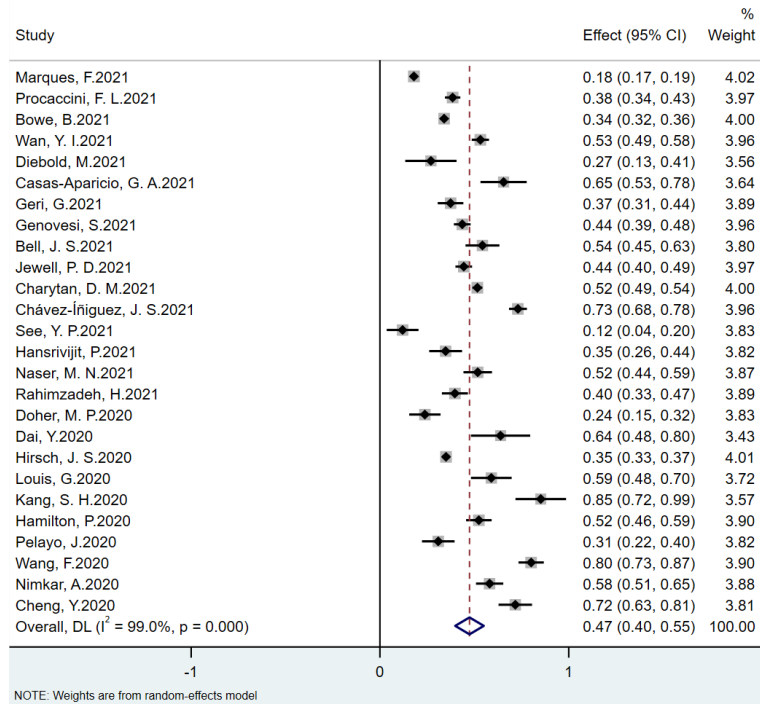

### Supplementary Figure 3 Sensitivity analysis for hypertension

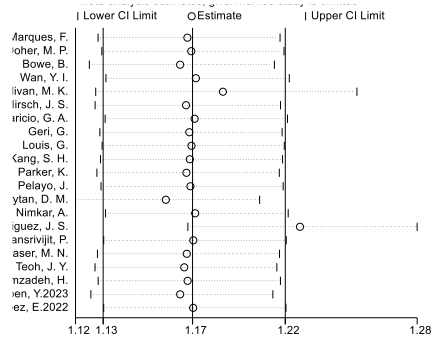

### Supplementary Figure 4 Sensitivity analysis for chronic kidney disease

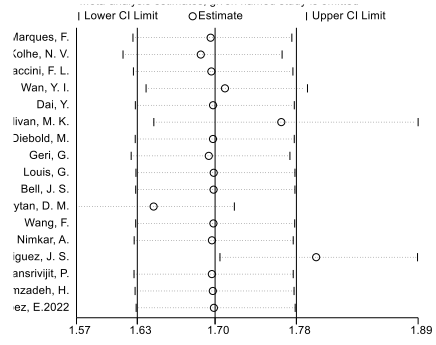

## Supplementary Figure 5 Sensitivity analysis for diabetes mellitus

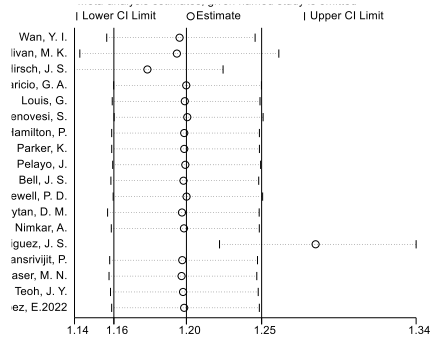

## Supplementary Figure 6 Funnel plot

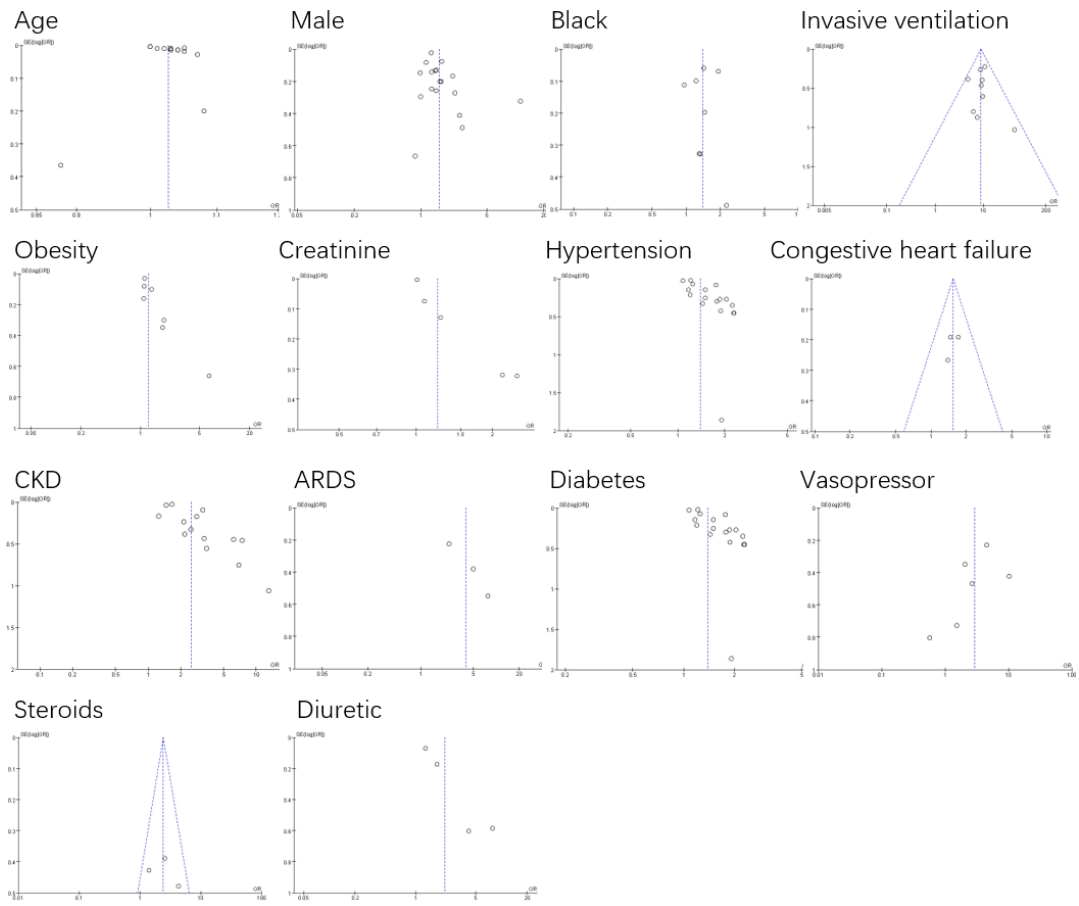

Supplement: IRNF_A_2170809_SM8643.pdf [file IRNF_A_2170809_SM8643.pdf]
